***In vivo* evaluation of the antiviral effect of ClO<sub>2</sub> in chicken embryos inoculated with avian  
infectious bronchitis coronavirus**

Zambrano-Estrada, Xóchitl<sup>a</sup>, Domínguez-Sánchez, Carlos<sup>b</sup>, Banuet-Martínez, Marina<sup>b</sup>, Guerrero de  
la Rosa, Fabiola<sup>b</sup>, García-Gasca, Teresa<sup>c</sup>, Acevedo-Whitehouse, Karina<sup>b</sup>

<sup>a</sup> Laboratory of Veterinary Diagnostic Pathology. School of Natural Sciences. Autonomous

University of Queretaro. Av. De las Ciencias S/N. Juriquilla, Queretaro. Qro. C.P. 76230. Mexico,

<sup>b</sup> Unit for Basic and Applied Microbiology. School of Natural Sciences. Autonomous University of

Queretaro. Anillo Vial Fray Junípero Serra, Querétaro, Qro. C.P. 76140

<sup>c</sup> Laboratory of Cellular Biology. School of Natural Sciences. Autonomous University of Queretaro.

Av. De las Ciencias S/N. Juriquilla, Queretaro. Qro. C.P. 76230. Mexico

**Corresponding author:** Karina Acevedo-Whitehouse (karina.acevedo.whitehouse@uaq.mx)

## Abstract

The need for safe and effective antiviral treatments is pressing, particularly given the number of viral infections that are prevalent in animal and human populations, often causing devastating economic losses and mortality. In the context of the current coronavirus pandemic, which has highlighted how devastating the effects of a virus can be on a naïve population, it is imperative to have rigorous and unbiased data on the efficacy and safety of potential antiviral treatments, particularly those that have demonstrated virucidal effects as a disinfectant, are being considered for use despite warnings on their potential toxicity, but no not have empirical evidence of their antiviral effect *in vivo*. Here, we tested the effect of chlorine dioxide (ClO<sub>2</sub>) on chick embryos infected with avian infectious bronchitis coronavirus (IBV). We determined virus-induced mortality on 10-day old embryos inoculated with 10<sup>4</sup> mean EID<sub>50</sub>/mL of attenuated Massachusetts and Connecticut IBV strains. We determined viral titres using RT-qPCR and conducted histopathological examination of various tissues and organs. Viral titres were 2.4-fold lower and mortality was reduced by half in infected embryos that were treated with ClO<sub>2</sub>. Infection led to developmental abnormalities regardless of treatment. Lesions typical of IBV infections were observed in all inoculated embryos, but severity tended to be lower in ClO<sub>2</sub>-treated embryos. We found no gross or microscopic evidence of toxicity caused by ClO<sub>2</sub> at the doses used herein. Our study shows that ClO<sub>2</sub> could be a safe and viable option for controlling avian coronavirus, and raises the possibility that similar effects could be observed in other organisms.

## Keywords

Chlorine dioxide, ClO<sub>2</sub>, coronavirus, IBV, antiviral, chick embryo

## Introduction

Since its start in January 2020, the COVID19 outbreak quickly reached pandemic proportions with a steep rise in mortality and mounting pressure on health services worldwide, as well as marked damage to the economy (Duan et al., 2020; Nicola et al., 2020). The pandemic has evidenced that our available repertoire of antiviral drugs is insufficient. Existing antiviral [remdesivir (Wang et al., 2020) and lopinavir/ritonavir (Kim et al., 2020; Lim et al., 2020)], anti-inflammatory [dexamethasone (Villar et al., 2020)], and immunomodulatory drugs [chloroquine (Borba et al., 2020), hydroxychloroquine (Meo et al., 2020; Sinha and Balayla, 2020), and ivermectin (Caly et al., 2020; Heidary and Gharebaghi, 2020)], have been proposed as treatment following clinical trials. However, except for dexamethasone, none of these drugs are currently recommended by the World Health Organization to treat COVID19 patients other than outside the context of clinical trials due to serious side effects (WHO, 2020). Despite this recommendation, remdesivir has already been approved in some countries for emergency use in patients with severe COVID19 symptoms, as it decreases the duration of hospitalization and shows a modest reduction of mortality rates in severely afflicted patients (Beigel et al., 2020). However, given that this drug costs 2,430 USD per treatment<sup>1</sup>, it is unlikely to be a sustainable option for developing countries, such as those in Latin America, where the number of new COVID19 cases continues to grow steadily. With nearly 38 million confirmed infections worldwide and more than one million deaths at the time of writing this paper, the need for effective and safe options to treat COVID19 patients is urgent.

The surge in COVID19 cases and the lack of effective treatments have led to a growing number of informal reports and testimonials across social networks regarding the oral and intravenous use of

---

<sup>1</sup> <https://www.gilead.com/news-and-press/press-room/press-releases/2020/6/an-open-letter-from-daniel-oday-chairman--ceo-gilead-sciences>

chlorine dioxide (ClO<sub>2</sub>) solution as an efficacious treatment of COVID19. In an unprecedented move, the Senate of Bolivia authorized the extraordinary use of ClO<sub>2</sub> to “manufacture, sell, supply and use ClO<sub>2</sub> to prevent and treat COVID19” (law PL N° 219/2019-2020 CS approved 15 July 2020). This situation has sparked concern from health agencies of various countries regarding the potential toxicity of using this disinfectant as a treatment, given that ClO<sub>2</sub> has strong oxidative properties. Chlorine dioxide, a gas that is highly soluble in water, has been known since 1946 for its broad antimicrobial properties (Sigstam et al., 2014), for which it is commonly used to purify water for human consumption, decontaminate produce and other food items (López-Gálvez et al., 2018), and disinfect surgical instruments (Doona et al., 2014). According to the Food and Drug Administration (FDA) of the US, consuming ClO<sub>2</sub> can lead to adverse effects such as 'vomiting, diarrhoea, dehydration, abdominal pain, methemoglobinemia and systemic failures that could potentially lead to death'. However, an impartial review of the scientific peer-reviewed literature reveals few case reports of human patients presenting adverse effects after consumption of ClO<sub>2</sub>, none of which were fatal, and in all cases reversed completely after treatment (Kishan, 2009; Bathina et al., 2013; Romanovsky et al., 2013; Loh and Shafi, 2014). Published studies on ClO<sub>2</sub> toxicity have reported null to mild effects in adult humans and other animals (e.g. Lubbers et al., 1982; Akamatsu et al., 2012; Ma et al., 2017) and have stressed that toxicity is strongly dose-dependent (Bercz et al., 1982; Hose et al., 1989; Ma et al., 2017). Interestingly, despite the voiced concerns, there are two drugs based on acidified sodium chloride (a precursor for generation of ClO<sub>2</sub>, named NP001 and WF10) that have been used intravenously in humans to treat diverse conditions, including diabetic foot ulcer and amyotrophic lateral sclerosis (ALS), without reporting adverse reactions (Yingsakmongkol et al., 2011; Yingsakmongkol, 2013; Miller et al., 2015; Maraprygsavan et al., 2016).

The virucidal effect of ClO<sub>2</sub> when used as a disinfectant of water and hard surfaces is well documented. Specifically, there is evidence of virucidal activity against echovirus (Zhong et al., 2017), enterovirus (Jin et al., 2013), poliovirus (Simonet and Gantzer, 2006), rotavirus (Chen and Vaughn, 1990), norovirus (Lim et al., 2010; Montazeri et al., 2017), calicivirus (Montazeri et al., 2017), and coronavirus (Wang et al., 2005). However, to date, there are few publications that explore potential antiviral effects *in vitro* and *in vivo*. One of the few studies available found that mice that were exposed to influenza A virus in an environment that contained aerosolized ClO<sub>2</sub> had significantly lower mortality than mice that were solely exposed to Influenza A virus (Ogata and Shibata, 2008). The authors reported that the antiviral effect was due to denaturation of hemagglutinin and neuraminidase glycoproteins, a finding that concurs with previous studies that explain the virucidal mechanism of action of ClO<sub>2</sub> due to oxidation of amino acid residues that are key for cell entry (Noss and Olivieri, 1985; Ison et al., 2006; Stewart et al., 2008). More recently, the antiviral mechanism of action of ClO<sub>2</sub> was investigated *in vitro* using pig alveolar macrophages and MARC-145 cells exposed to the porcine reproductive and respiratory syndrome virus (PRRSV1), finding that the chemical also inhibits the synthesis of pro-inflammatory molecules that contribute to the pathogenesis of this disease (Zhu et al., 2019). The authors concluded that viral synthesis of RNA and proteins was impeded by ClO<sub>2</sub>, leading to a reduction in viral replication. Despite these studies, to date there has been no published report of an *in vivo* assessment of the antiviral effect of ClO<sub>2</sub>. Here, we have investigated the effect of a ClO<sub>2</sub> solution in 10-day old chick embryos inoculated with attenuated avian infectious bronchitis coronavirus (IBV) Massachusetts and Connecticut vaccine strains, which are pathogenic for birds during their embryonic stages of development (Tsai et al., 2016).

## Methods

### Chick embryo inoculation

We used 30 10-day old SPF RossxRoss chick embryos (Pilgrims, Mexico) incubated at 38°C and 65-70% humidity (Guy, 2015). Embryos were placed at random within the incubator to avoid any slight variation in humidity and temperature that could affect results. Prior to starting the experiment, all embryos were candled to ensure their viability, and were examined daily to search for evidence of death (presence of blood ring or lack of visible eggshell membrane blood vessels). Five chick embryos were assigned to each of the six experimental groups and treated accordingly (see Table 1). In all cases, embryos were inoculated via the chorioallanotic sac, as recommended for avian coronavirus replication (Jordan and Nassar, 1973; Escorcia et al., 2002). Before inoculation, the eggshell was disinfected with 70% ethanol and 3.5% iodine (Guy, 2015). Using the tip of sterile scissors, a hole was drilled in the eggshell over a 1 cm<sup>2</sup> transparent tape film and a sterile 1ml syringe with a 28-g 5/16" needle was used to administer the treatment directly into the allantoic cavity as indicated in Table 1. All procedures were carried out aseptically. After inoculation, the drilled hole was sealed with a drop of glue and the embryo was returned to the incubator. Inoculation of every embryo was performed by a single person to ensure experimental variation was kept at a minimum. Embryos were candled daily to determine mortality. As there was no death recorded within the first 24 h post-inoculation, none of the embryos were discarded from the experiment.

#### Macroscopic examination

Seven days after inoculation, embryos were sacrificed according to the American Veterinary Medical Association guidelines on humane treatment and euthanasia of chick embryos over 13 days of age (AVMA 2020). The embryos were placed at 4 °C for 4 h to ensure blood coagulation and avoid contamination of the allantoic fluid (Guy, 2015). Next, each egg was placed on a firm

surface with the air chamber facing upwards. The eggshell over the air chamber was disinfected with 70% ethanol and 3.5% iodine (Guy, 2015) and using sterile scissors, the eggshell and chorioallantoic membrane were removed to expose the allanotic fluid. A sterile pipette was used to aspirate 750  $\mu$ l of the fluid and transfer it to a sterile cryovial before storage at  $-70^{\circ}\text{C}$ . Next, the embryo was removed from the eggshell using sterile dissection forceps and placed in a sterile Petri dish to be photographed.

Each embryo was cleaned with distilled water to remove any remaining albumin, vitellus and amniotic fluid before its mass was determined with a precision scale ( $\pm 0.1$  mg). Embryonic axis length was measured with digital callipers ( $\pm 0.1$  cm). After decapitation with a sterile scalpel blade, each embryo was examined for macroscopic lesions typically caused by avian coronavirus, such as cutaneous haemorrhages, stunting, curving, urate deposits in the kidney and feather alterations (Escorcia et al., 2002; Alexander D.J. and D.A. Senne, 2008). Chick embryos were considered to have died during the experiment when there was evidence of disconnected or detached blood vessels of the chorioallantoic membrane or their organs exhibited imbibition of haemoglobin. Further evidence of mortality was determined by examining the presence of autolysis at microscopic examination.

For each chick embryo, both femurs were dissected and their length was determined and averaged with a digital calliper as a surrogate measure of chick development. We collected samples of all organs and tissues, including those known to be affected by the Massachusetts and Connecticut strains of avian coronavirus, namely trachea, lung, proventricle, duodenum, liver, kidneys and the Bursa of Fabricius (Escorcia et al., 2002; Cavanagh, 2003, 2007; Tsai et al., 2016), and those reportedly affected by exposure to  $\text{ClO}_2$ , namely thyroid (Bercz et al., 1982; Harrington et al., 1986), thymus, spleen and bone marrow (EPA, 2000).

## Microscopic examination

Samples were cut longitudinally at their mid-section and immersed in 10% buffered formalin, pH 7.4. Fixed samples were paraffin-embedded and sectioned at 3 µm with a microtome before being stained with haematoxylin-eosin for microscopic examination. The slides were observed under the microscope at 40X and 100X.

To assess haematopoietic status, bone marrow preparations were used for a 200-cell differential count to classify the marrow precursors and to determine the myeloid:erythroid (M/E) ratio for each embryo. This ratio was obtained by dividing the sum of all the granulocytic cells by the sum of all the erythrocytic cells (Schalm and Jain, 1986).

## Virus quantitation by RT-qPCR

The virus was quantified in the allantoid fluid with an RT-qPCR protocol (Naguib et al., 2017). Briefly, RNA was extracted by adding 700 µL of Trizol (Invitrogen) to 500 µL of each sample. The sample was incubated for 10 min at ambient temperature. Next, 200 µL of chloroform were added, mixed by inversion, and centrifuged at 12,000 g for 10 min at 4 °C. The aqueous phase was transferred to a sterile microtube, and 500 µL of isopropanol were added. The sample was centrifuged at 12,000 g for 10 min at 4 °C prior to decanting the supernatant. The pellet was washed with 500 µL of cold 70% ethanol, centrifuged at 7,500 g for 5 min at 4 °C and the supernatant was removed completely. The dry pellet was resuspended in 12 µL of nuclease-free water and centrifuged at 7,500 g for 1 min at 4 °C. Quantity and quality of the extracted RNA was examined in a Nanodrop (Qiagen) spectrophotometer and all samples were diluted to 35 ng/mL RNA before retrotranscription.

cDNA synthesis was performed with oligo dT and MLV reversotranscriptase (Invitrogen) according to the manufacturer's instructions. Briefly, we used 8 µL of RNA, 1 µL of Oligo DT (50 ng/µL), 1 µL of



10 mM dNTP and 2  $\mu$ L of nuclease-free H<sub>2</sub>O. The reactions were incubated at 65 °C for 5 min and placed on ice for 1 min. Seven  $\mu$ L of the kits cDNA synthesis mix, which contains 4  $\mu$ L 5X First-Strand Buffer, 2  $\mu$ L 0.1 M DTT and 1  $\mu$ L RNase and DNase free H<sub>2</sub>O, were added prior to mixing by pipetting and incubating at ambient temperature (~25 °C) for 2 min. We added 1  $\mu$ L pf SuperScript II RT, mixed by pipetting and incubated at ambient temperature for 10 min. The reactions were incubated at 42 °C for 50 min and inactivated at 70 °C for 15 min. All cDNA samples were stored at -20°C until used.

A 100 bp fragment of the avian coronavirus N gene was amplified using primers IBV-pan\_FW-1 (5'-CAG TCC CDG ATG CNT GGT A) and IBV-pan\_RV (5'-CC TTW SCA GMA ACM CAC ACT) (Naguib et al., 2017). Quantitation was done with SYBR Green qPCR (Qiagen) in a real-time thermal cycler (CFX connect, Biorad) under the following protocol: 45 °C for 10 min, initial denaturation at 95 °C for 10 min and 35 cycles of 95 °C for 15 s, 52 °C for 15 s, and 68 °C for 30 s, with a final extension step at 68 °C for 10 min. We used a cDNA sample extracted from 500  $\mu$ L of the vaccine as a positive control (the vaccine contained 10<sup>4</sup> mean embryo infective dose (EID<sub>50</sub>)/mL of coronavirus strains Massachusetts and Connecticut). A linear regression was used to calculate the correlation coefficient ( $R^2 = 0.99$ ) and the slope value ( $b = -5.062$ ) of the RNA copy number and Cq values using a 10-fold dilution of the vaccine (10<sup>4</sup> to 10<sup>-1</sup>; see standard curve in Supplementary material). The number of viral RNA copies (hereafter viral load) was determined by comparing the Cq against this standard curve (Naguib et al., 2017). All cDNA samples were diluted 1:10 prior to running the qPCR assays.

## Statistical analyses

Contingency tables were built to investigate differences in the number of dead vs. live chick embryos between experimental groups. The relative risk of developing virus-related lesions between treated and un-treated embryos was calculated using Fisher exact tests to estimate

significance. Body mass, morphometrics, viral load, and lesion severity were compared among groups by one-way ANOVA and post-hoc Tukey HSD tests. All analyses were performed in R version 3.6.3 (R Core Team, 2016). Contingency tables, Fisher exact p-values and odds ratios were calculated with R package Epitools version 0.5-10.1.

# Bioethics statement

This study was carried out in compliance with the American Veterinary Medical Association (AVMA) guide for humane treatment of chick embryos and approved by the Autonomous University of Queretaro Research Ethics Committee.

## **Results**

Avian coronavirus RNA was detected in all of the embryos that were inoculated with the vaccine (n=15, in all cases Cq <40). The viral load varied significantly between treatments (ANOVA;  $F_{2,12}=4.421$ ,  $p=0.036$ ; Fig. 1), being 2.4 times higher in the untreated embryos. The average viral load of ClO<sub>2</sub>-treated chicks was 10<sup>4.3</sup>/mL, range: 10<sup>3.66</sup> – 10<sup>5.03</sup> and of untreated chicks was 10<sup>4.83</sup>/mL, range: 10<sup>4.52</sup> – 10<sup>5.01</sup>, respectively (Tukey HSD, Group E vs. F,  $p = 0.03$ ). There were no differences in the viral load between both ClO<sub>2</sub>-treated groups ( $p>0.05$ ).

Embryo mortality varied among groups (Fig. 2) and differed significantly between virus-inoculated and virus-free embryos (Pearson's  $\chi^2 = 7.78$ ;  $p = 0.004$ ), reaching 80 % (4/5) of mortality in the viral control group (Group F). In the groups that contained viral-inoculated embryos treated with ClO<sub>2</sub>, 1/5 (20 %) of the infected embryos in the low dosage group (Group D) and 2/5 (40 %) of the infected embryos in the high dosage group (Group E) died. In the groups that were not infected

with the virus, there was only one death observed, in the group that received the high dosage of ClO<sub>2</sub> (Group C).

Body mass, embryonic axis length and femur length differed between the virus-inoculated and virus free-groups, regardless of ClO<sub>2</sub> treatment. All of the virus-inoculated embryos exhibited dwarfing and had, on average, 38% lower mass ( $t = 21.15$ ,  $df = 29.40$ ,  $p = 2.2 \times 10^{-16}$ ; Fig. 3A), 10% shorter axis length ( $t = 58.43$ ,  $df = 29.26$ ,  $p = 2.2 \times 10^{-16}$ ; Fig. 3B), and 20% shorter femur length ( $t = 8.49$ ,  $df = 23.34$ ,  $p = 1.4 \times 10^{-8}$ ; Fig 3C) than the virus-free groups. When analysing growth in the virus-inoculated groups, mass was significantly higher in embryos that were treated with ClO<sub>2</sub> ( $t = -2.74$ ,  $df = 12.98$ ,  $p = 0.017$ ). Body length of virus-inoculated chicks did not vary according to ClO<sub>2</sub> treatment ( $p > 0.1$ ). See supplementary material for photographs of the embryos.

Lesions previously described in embryos infected with avian coronavirus were observed at post mortem examination. Namely, curling, the presence of white caseous material (urates), thickened amnion and allantoic membranes that adhered to the embryos, oedematous serous membranes, epidermal congestion, and subcutaneous haemorrhage (Table 2). Virus-inoculated embryos that were treated with ClO<sub>2</sub> had a lower risk of epidermal congestion (RR = 0.4; Wald 95% CI: 0.187-0.855;  $p = 0.04$ ), haemorrhage (RR = 0.1; Wald 95% CI: 0.016 - 0.642;  $p = 0.002$ ), curling (RR = 0.019; Wald 95% CI: 0.125 - 0.844;  $p = 0.017$ ) and thickened membranes (RR = 0;  $p = 0.003$ ) than untreated infected embryos. All the embryos had a pale liver and mildly congested lungs, regardless of their experimental group. Pale enlarged kidneys were observed in the virus-inoculated groups but not in the virus-free groups, regardless of ClO<sub>2</sub>-treatment (see Table 2).

Microscopic lesions compatible with avian IBV infection were observed in various organs in all virus-inoculated groups (Fig. 4). The severity of the lesions was either similar or slightly lower in the embryos that had been treated with ClO<sub>2</sub> than in the embryos that did not receive any

treatment (Table 3). Two exceptions were the kidneys and the duodenum. In the kidneys, swelling and degeneration of renal tubular epithelium was more common and more severe in the infected chicks that were administered ClO<sub>2</sub> than in the infected embryos that did not receive ClO<sub>2</sub>, although the former presented mitotic cells. The duodenal villi of the embryos in the IBV-infected groups were longer (ANOVA; F<sub>5,18</sub> = 5.62, p = 0.003), and their base was wider (ANOVA; F<sub>5,18</sub> = 13.65, p = 1.39 x 10<sup>-05</sup>) than embryos from the none-infected groups, and they were moderately congested. Duodenal villous atrophy varied amongst groups (ANOVA; F<sub>5,18</sub> = 5.71, p = 0.003) and *post-hoc* comparisons revealed that the significant differences were E vs. B (p = 0.021) and E vs. C (p = 0.001). The percent of bursal lymphoid tissue decreased markedly in the virus-inoculated embryos (ANOVA; F<sub>5,12</sub> = 3.58, p = 0.033; see Fig. 4). Virus-inoculated embryos showed mild apoptosis in the thymus and heterophilic infiltration. Amongst the six experimental groups, all of the embryos examined presented subacute heterophilic bursitis, and pulmonary interstitial multifocal heterophilic foci with congestion (Table 3).

There were no observable alterations to the architecture and integrity of the tissues of non-infected embryos that were administered ClO<sub>2</sub> (Experimental groups B and C), nor was any difference in the area (μm<sup>2</sup>) of the thyroid (p>0.1). ClO<sub>2</sub>-treated groups showed a slightly higher myeloid to erythroid ratio in the bone marrow than the experimental control group and the viral control group, although the difference was not statistically significant (ANOVA; F<sub>5,15</sub> = 2.33, p = 0.094).

## Discussion

The use of chlorine dioxide (ClO<sub>2</sub>) as a disinfectant is well established, and its virucidal effects are reported against a wide range of enveloped and non-enveloped viruses that can affect human and domestic animal health. To date, its informal use as an antiviral drug is polemical, and there are no

published studies that have explored the antiviral action of this substance following oral or parenteral administration. We have investigated the antiviral effect of 30 ppm and 300 ppm ClO<sub>2</sub> solutions (both concentrations below the reported NOAEL; Bercz et al., 1982) in chick embryos infected with avian infectious bronchitis coronavirus (IBV) strains. We observed a reduction in viral titre in infected embryos that were treated with ClO<sub>2</sub>. Mortality decreased substantially in the ClO<sub>2</sub>-treated embryos, although alterations to chick development were prevalent regardless of treatment.

Virulent avian IBV strains typically have a burst size of 10 to 100 infective units per cell (Robb and Bond, 1979), which appear in culture within six hours and can reach peak virus titres of 10<sup>6.5</sup>–10<sup>8.5</sup> TCID<sub>50</sub> after 36 hours (Otsuki et al., 1979). The vaccine strains used here have lower replication efficiencies as they are attenuated (Tsai et al., 2020), but they are capable of replicating and causing damage in chick embryos (Tsai et al., 2016). With 2,000 infective units (200 µl of 10<sup>4</sup> infective units/mL) inoculated into each embryo, the ClO<sub>2</sub> treatments decreased viral load 2.4-fold compared to the infected non-treated embryos, representing an average difference of 42,711 infective units. This result could be explained by two mechanisms described for ClO<sub>2</sub>. Firstly, direct destruction or neutralization of the virions exposed to ClO<sub>2</sub>, could have occurred due to denaturing of their envelope glycoproteins following oxidation of amino acid residues (Noss and Olivieri, 1985; Ison et al., 2006; Ogata and Shibata, 2008). Secondly, viral replication efficiency could have decreased due to ClO<sub>2</sub>-induced biochemical changes in the extra- or intracellular milieu impeding the synthesis of viral RNA and proteins (see Enjuanes et al., 2006; Zhu et al., 2019). These proposed mechanisms of action are not mutually exclusive.

The effects of reduced viral titres in the infected embryos were evident, with a 50 to 75% reduction in mortality in the treated embryos treated with 300 ppm and 30 ppm of ClO<sub>2</sub>, respectively. However, developmental abnormalities were observed in the majority of the infected

embryos, including the groups that received ClO<sub>2</sub> treatment. Namely, dwarfing, assessed by body mass, axis length, and femur length were significantly lower in all infected embryos, as expected to occur in IBV infections (Balasubramaniam et al., 2013). In contrast, curling – also caused by avian IBV (Wickramasinghe et al., 2011; Mork et al., 2014) – was virtually absent in the embryos that received ClO<sub>2</sub> after infection. Alterations associated with IBV infection were observed in the proventriculus, spleen, liver, but specifically in kidneys, trachea and lung. (Butcher et al., 1990; Cook et al., 2012) were observed in most of the infected embryos, including those that were administered ClO<sub>2</sub>. However, for most of these abnormalities, severity was lower or similar in the ClO<sub>2</sub>-treated groups. One exception was the pathology observed in the kidneys, where lesions indicative of nephrosis were more severe and frequent in the IBV-infected embryos treated with ClO<sub>2</sub> than in the IBV-infected non-treated embryos. Such lesions in the kidneys are unlikely to be due to the ClO<sub>2</sub> treatment itself, given that none of the non-infected embryos that were administered ClO<sub>2</sub> showed any abnormality in the kidneys. Similarly, atrophy of the duodenal villi was highest in the inoculated group that was administered a high dose of ClO<sub>2</sub>, but absent in the non-infected groups that only received ClO<sub>2</sub>. If duodenal atrophy and nephropathogenicity in IBV-infected embryos are mitigated by inflammatory responses (Chhabra et al., 2018), it is possible that the observed tubular damage reflected ClO<sub>2</sub>-driven downregulation of acute inflammation that allowed virion replication in the tubular epithelium and in the duodenal villi. This scenario could be plausible if we consider that a recent study that investigated the antiviral effect of ClO<sub>2</sub> in pig alveolar macrophages and African green monkey kidney cells infected with the porcine reproductive and respiratory syndrome virus (PRRSV1) *in vitro*, reported downregulation of pro-inflammatory cytokines IL-1, IL-6 and TNF- $\alpha$  (Zhu et al., 2019). The drug NP001 (a chemical precursor of ClO<sub>2</sub>) exerts strong anti-inflammatory responses by inhibiting macrophage activation in humans, even after a single dose (Miller et al., 2014). In turn, WF10, a strong oxidizing agent

that is related to ClO<sub>2</sub> (Veerasarn et al., 2004), induces apoptosis of inflammatory cells and downregulates pro-inflammatory genes (Giese et al., 2004; Yingsakmongkol et al., 2011). Interestingly, the affected renal tubules had mitotic cells, suggestive of regeneration as a reparative response to damage of the renal tubular epithelium (Toback, 1992; Fujigaki, 2012; Lombardi et al., 2016). This possibility will need to be explored further in the animal model used in our study. Unfortunately, knowledge of IBV pathogenesis, immune responses and tissue reparation in the embryonated egg is limited. In hatched birds, IBV can impact lymphocyte populations by inducing apoptosis, thus impeding virus clearance (Caron, 2010). We found some evidence of this effect, as the virus-inoculated embryos had a reduced percent of bursal lymphoid tissue.

Taken together, our results indicate that ClO<sub>2</sub> limited viral replication but as the embryos were only administered a single dose of a ClO<sub>2</sub> solution rather than repeated doses, not all virions were eliminated. The viruses that remained viable after administration of the ClO<sub>2</sub> were able to replicate, yielding lower viral titres, and the damage that they caused to the embryos was less severe and ultimately led to less mortality than in the untreated infected embryos. Repeated administrations of ClO<sub>2</sub> solution might have reduced the viral load further, plausibly leading to even less virus-induced damage, a possibility that we could not explore in this model. However, an important result of our study was the lack of evidence of tissue damage caused by ClO<sub>2</sub> itself. Only one (20%) of the uninfected embryos treated with the high dose of ClO<sub>2</sub> died, and this difference was not statistically significant to the experimental control. It is possible that the death was due to other causes, as a 20% embryo mortality rate is considered normal in aviculture (Romanoff, 1972; Fasnko & O'Dea, 2008).

Further studies should aim to test the antiviral effect of ClO<sub>2</sub> in hatched chicks, which have a more mature immune system, and where repeated administrations are easier to procure. However, it is

promising that we found an evident effect against IBV without any significant adverse effect or evidence of toxicity to the chick embryos. Much research needs to be done before it is possible to generalize and extrapolate our findings to other viruses and animal hosts. However, in the context of the current COVID-19 crisis, with near to none viable, accessible and safe therapeutic option available, it might be prudent to consider conducting controlled double-blind and randomized studies on the antiviral effect of ClO<sub>2</sub> in COVID-19 patients.

### **Statement of conflict of interest**

The authors declare they do not have any conflict of interest regarding this submission.

### **Funding**

This research did not receive any specific grant from funding agencies in the public, commercial, or not-for-profit sectors.

### **Author contributions**

K.A-W. and T.G-G. conceived the idea. K.A-W. supervised the experiments, performed statistical analyses and wrote the manuscript. X.Z-E. performed all gross examinations and histopathology analyses. C.D-S. conducted molecular assays and artwork. M.B-M. and F.G-D performed the inoculation experiments and assisted during necropsies. All authors participated in the discussion of results.

### **Acknowledgments**

We thank Luis A. Soto-García and Karla Zamora y Cuevas for their help with photographic and video documentation of the experiment.



## References

- Akamatsu, A., Lee, C., Morino, H., Miura, T., Ogata, N., Shibata, T., 2012. Six-month low level chlorine dioxide gas inhalation toxicity study with two-week recovery period in rats. J. Occup. Med. Toxicol. 7, 2. doi:10.1186/1745-6673-7-2
- Alexander D.J. and D.A. Senne, 2008. A Laboratory Manual for the Isolation, Identification and Characterization of Avian Pathogens, American Association of Avian Pathologists. ISBN:9780978916374
- AVMA, 2020. Guidelines for the Euthanasia of Animals. American Veterinary Medicine Association. ISBN:978-1-882691-54-8.
- Balasubramaniam, A., Sukumar, K., Suresh, P., Puvarajan, B., 2013. Molecular characterisation of membrane glycoprotein and 5b protein of nephropathogenic infectious bronchitis virus. Vet. World. doi:10.14202/vetworld.2013.857-861
- Bathina, G., Yadla, M., Burri, S., Enganti, R., Prasad Ch, R., Deshpande, P., Ch, R., Prayaga, A., Uppin, M., 2013. An unusual case of reversible acute kidney injury due to chlorine dioxide poisoning. Ren. Fail. 35, 1176–1178. doi:10.3109/0886022X.2013.819711
- Beigel, J.H., Tomashek, K.M., Dodd, L.E., Mehta, A.K., Zingman, B.S., Kalil, A.C., Hohmann, E., Chu, H.Y., Luetkemeyer, A., Kline, S., Lopez de Castilla, D., Finberg, R.W., Dierberg, K., Tapson, V., Hsieh, L., Patterson, T.F., Paredes, R., Sweeney, D.A., Short, W.R., Touloumi, G., Lye, D.C., Ohmagari, N., Oh, M.-D., Ruiz-Palacios, G.M., Benfield, T., Fätkenheuer, G., Kortepeter, M.G., Atmar, R.L., Creech, C.B., Lundgren, J., Babiker, A.G., Pett, S., Neaton, J.D., Burgess, T.H., Bonnett, T., Green, M., Makowski, M., Osinusi, A., Nayak, S., Lane, H.C., 2020. Remdesivir for the Treatment of Covid-19 - Final Report. N. Engl. J. Med. doi:10.1056/NEJMoa2007764

376 Bercz, J.P., Jones, L., Garner, L., Murray, D., Ludwig, D.A., Boston, J., 1982. Subchronic toxicity of  
377 chlorine dioxide and related compounds in drinking water in the nonhuman primate.  
378 Environ. Health Perspect. 46, 47–55. doi:10.1289/ehp.824647

379 Borba, M.G.S., Val, F.F.A., Sampaio, V.S., Alexandre, M.A.A., Melo, G.C., Brito, M., Mourão, M.P.G.,  
380 Brito-Sousa, J.D., Baía-da-Silva, D., Guerra, M.V.F., Hajjar, L.A., Pinto, R.C., Balieiro, A.A.S.,  
381 Pacheco, A.G.F., Santos, J.D.O., Naveca, F.G., Xavier, M.S., Siqueira, A.M., Schwarzbald, A.,  
382 Croda, J., Nogueira, M.L., Romero, G.A.S., Bassat, Q., Fontes, C.J., Albuquerque, B.C., Daniel-  
383 Ribeiro, C.T., Monteiro, W.M., Lacerda, M.V.G., 2020. Effect of High vs Low Doses of  
384 Chloroquine Diphosphate as Adjunctive Therapy for Patients Hospitalized With Severe Acute  
385 Respiratory Syndrome Coronavirus 2 (SARS-CoV-2) Infection: A Randomized Clinical Trial.  
386 JAMA Netw. open. doi:10.1001/jamanetworkopen.2020.8857

387 Butcher, G.D., Winterfield, R.W., Shapiro, D.P., 1990. Pathogenesis of H13 nephropathogenic  
388 infectious bronchitis virus. Avian Dis. 34, 916–921.

389 Caly, L., Druce, J.D., Catton, M.G., Jans, D.A., Wagstaff, K.M., 2020. The FDA-approved drug  
390 ivermectin inhibits the replication of SARS-CoV-2 *in vitro*. Antiviral Res.  
391 doi:10.1016/j.antiviral.2020.104787

392 Caron, L.F., 2010. Etiology and immunology of infectious bronchitis virus. Rev. Bras. Cienc. Avic.  
393 doi:10.1590/S1516-635X2010000200007

394 Cavanagh, D., 2007. Coronavirus avian infectious bronchitis virus. Vet. Res. 38, 281–297.  
395 doi:10.1051/vetres:2006055

396 Cavanagh, D., 2003. Severe acute respiratory syndrome vaccine development: experiences of  
397 vaccination against avian infectious bronchitis coronavirus. Avian Pathol. 32, 567–582.

398       doi:10.1080/03079450310001621198

399       Chen, Y.S., Vaughn, J.M., 1990. Inactivation of human and simian rotaviruses by chlorine dioxide.

400       Appl. Environ. Microbiol. 56, 1363–1366. doi:10.1128/AEM.56.5.1363-1366.1990

401       Chhabra, R., Ball, C., Chantrey, J., Ganapathy, K., 2018. Differential innate immune responses

402       induced by classical and variant infectious bronchitis viruses in specific pathogen free chicks.

403       Dev. Comp. Immunol. 87, 16–23. doi:10.1016/j.dci.2018.04.026

404       Cook, J.K.A., Jackwood, M., Jones, R.C., 2012. The long view: 40 years of infectious bronchitis

405       research. Avian Pathol. 41, 239–250. doi:10.1080/03079457.2012.680432

406       Doona, C.J., Feeherry, F.E., Setlow, P., Malkin, A.J., Leighton, T.J., 2014. The Portable Chemical

407       Sterilizer (PCS), D-FENS, and D-FEND ALL: novel chlorine dioxide decontamination

408       technologies for the military. J. Vis. Exp. e4354. doi:10.3791/4354

409       Duan, H., Wang, S., Yang, C., 2020. Coronavirus: limit short-term economic damage. Nature.

410       doi:10.1038/d41586-020-00522-6

411       Enjuanes, L., Almazán, F., Sola, I., Zuñiga, S., 2006. Biochemical aspects of coronavirus replication

412       and virus-host interaction. Annu. Rev. Microbiol. 60, 211–230.

413       doi:10.1146/annurev.micro.60.080805.142157

414       EPA, 2000. Toxicological Review of Chlorine dioxide and Chlorite. CAS Nos. 10049-04-4 and 7758-

415       19-2. U.S. Environmental Protection Agency Washington, DC. <http://www.epa.gov/iris>.

416       Escorcia, M., Fortoul, T.I., Petrone, V.M., Galindo, F., López, C., Téllez, G., 2002. Gastric gross and

417       microscopic lesions caused by the UNAM-97 variant strain of infectious bronchitis virus after

418       the eighth passage in specific pathogen-free chicken embryos. Poult. Sci. 81, 1647–1652.

419       doi:10.1093/ps/81.11.1647

420 Fasenko, G.M., O'Dea, E.E., 2008. Evaluating Broiler Growth and Mortality in Chicks with Minor  
421 Navel Conditions at Hatching. *Poult. Sci.* 87,594–597. doi: 10.3382/ps.2007-00352

422 Fujigaki, Y., 2012. Different modes of renal proximal tubule regeneration in health and disease.  
423 *World J. Nephrol.* 1, 92–99. doi:10.5527/wjn.v1.i4.92

424 Giese, T., McGrath, M.S., Stumm, S., Schempp, H., Elstner, E., Meuer, S.C., 2004. Differential  
425 effects on innate versus adaptive immune responses by WF10. *Cell. Immunol.* 229, 149–158.  
426 doi:10.1016/j.cellimm.2004.08.001

427 Guy, J.S., 2015. Isolation and Propagation of Coronaviruses in Embryonated Eggs, in: Maier, H.J.,  
428 Bickerton, E., Britton, P. (Eds.), *Coronaviruses: Methods and Protocols*, Methods in Molecular  
429 Biology. Springer Protocols. New York. doi:10.1007/978-1-4939-2438-7\_7

430 Harrington, R.M., Shertzer, H.G., Bercz, J.P., 1986. Effects of chlorine dioxide on thyroid function in  
431 the African green monkey and the rat. *J. Toxicol. Environ. Health* 19, 235–242.  
432 doi:10.1080/15287398609530923

433 Heidary, F., Gharebaghi, R., 2020. Ivermectin: a systematic review from antiviral effects to COVID-  
434 19 complementary regimen. *J. Antibiot. (Tokyo)*. doi:10.1038/s41429-020-0336-z

435 Hose, J.E., Di Fiore, D., Parker, H.S., Sciarrotta, T., 1989. Toxicity of chlorine dioxide to early life  
436 stages of marine organisms. *Bull. Environ. Contam. Toxicol.* 42, 315–319.  
437 doi:10.1007/BF01699954

438 Ison, A., Odeh, I.N., Margerum, D.W., 2006. Kinetics and mechanisms of chlorine dioxide and  
439 chlorite oxidations of cysteine and glutathione. *Inorg. Chem.* 45, 8768–8775.  
440 doi:10.1021/ic0609554

441 Jin, M., Shan, J., Chen, Z., Guo, X., Shen, Z., Qiu, Z., Xue, B., Wang, Y., Zhu, D., Wang, X., Li, J., 2013.

442 Chlorine dioxide inactivation of enterovirus 71 in water and its impact on genomic targets.  
 443 Environ. Sci. Technol. 47, 4590–4597. doi:10.1021/es305282g

444 Jordan, F.T., Nassar, T.J., 1973. The combined influence of age of embryo and temperature and  
 445 duration of incubation on the replication and yield of avian infectious bronchitis (IB) virus in  
 446 the developing chick embryo. Avian Pathol. 2, 279–294. doi:10.1080/03079457309353804

447 Kim, J.-W., Kim, E.J., Kwon, H.H., Jung, C.Y., Kim, K.C., Choe, J.-Y., Hong, H.-L., 2020. Lopinavir-  
 448 ritonavir versus hydroxychloroquine for viral clearance and clinical improvement in patients  
 449 with mild to moderate coronavirus disease 2019. Korean J. Intern. Med.  
 450 doi:10.3904/kjim.2020.224

451 Kishan, H., 2009. Chlorine dioxide-induced acute hemolysis. J. Med. Toxicol. Off. J. Am. Coll. Med.  
 452 Toxicol.

453 Lim, J., Jeon, S., Shin, H.Y., Kim, M.J., Seong, Y.M., Lee, W.J., Choe, K.W., Kang, Y.M., Lee, B., Park,  
 454 S.J., 2020. Case of the index patient who caused tertiary transmission of coronavirus disease  
 455 2019 in Korea: The application of lopinavir/ritonavir for the treatment of COVID-19  
 456 pneumonia monitored by quantitative RT-PCR. J. Korean Med. Sci.  
 457 doi:10.3346/jkms.2020.35.e79

458 Lim, M.Y., Kim, J.-M., Ko, G., 2010. Disinfection kinetics of murine norovirus using chlorine and  
 459 chlorine dioxide. Water Res. 44, 3243–3251. doi:10.1016/j.watres.2010.03.003

460 Loh, J.M.R., Shafi, H., 2014. Kikuchi-Fujimoto disease presenting after consumption of “Miracle  
 461 Mineral Solution” (sodium chlorite). BMJ Case Rep. 2014. doi:10.1136/bcr-2014-205832

462 Lombardi, D., Becherucci, F., Romagnani, P., 2016. How much can the tubule regenerate and who  
 463 does it? An open question. Nephrol. Dial. Transplant. Off. Publ. Eur. Dial. Transpl. Assoc. -

464 Eur. Ren. Assoc. 31, 1243–1250. doi:10.1093/ndt/gfv262

465 López-Gálvez, F., Randazzo, W., Vásquez, A., Sánchez, G., Decol, L.T., Aznar, R., Gil, M.I., Allende,  
466 A., 2018. Irrigating Lettuce with Wastewater Effluent: Does Disinfection with Chlorine Dioxide  
467 Inactivate Viruses? J. Environ. Qual. 47, 1139–1145. doi:10.2134/jeq2017.12.0485

468 Lubbers, J.R., Chauan, S., Bianchine, J.R., 1982. Controlled clinical evaluations of chlorine dioxide,  
469 chlorite and chlorate in man. Environ. Health Perspect. 46, 57–62. doi:10.1289/ehp.824657

470 Ma, J.-W., Huang, B.-S., Hsu, C.-W., Peng, C.-W., Cheng, M.-L., Kao, J.-Y., Way, T.-D., Yin, H.-C.,  
471 Wang, S.-S., 2017. Efficacy and Safety Evaluation of a Chlorine Dioxide Solution. Int. J.  
472 Environ. Res. Public Health 14. doi:10.3390/ijerph14030329

473 Maraprygsavan, P., Mongkolsuk, J., Arnhold, J., Kuehne, F.-W., 2016. The chlorite-based drug  
474 WF10 constantly reduces hemoglobin A1c values and improves glucose control in diabetes  
475 patients with severe foot syndrome. J. Clin. Transl. Endocrinol. 4, 53–58.  
476 doi:10.1016/j.jcte.2016.05.001

477 Meo, S.A., Klonoff, D.C., Akram, J., 2020. Efficacy of chloroquine and hydroxychloroquine in the  
478 treatment of COVID-19. Eur. Rev. Med. Pharmacol. Sci. doi:10.26355/eurrev\_202004\_21038

479 Miller, R.G., Block, G., Katz, J.S., Barohn, R.J., Gopalakrishnan, V., Cudkowicz, M., Zhang, J.R.,  
480 McGrath, M.S., Ludington, E., Appel, S.H., Azhir, A., 2015. Randomized phase 2 trial of NP001-  
481 a novel immune regulator: Safety and early efficacy in ALS. Neurol. Neuroimmunol.  
482 neuroinflammation 2, e100. doi:10.1212/NXI.0000000000000100

483 Miller, R.G., Zhang, R., Block, G., Katz, J., Barohn, R., Kasarskis, E., Forshew, D., Gopalakrishnan, V.,  
484 McGrath, M.S., 2014. NP001 regulation of macrophage activation markers in ALS: a phase I  
485 clinical and biomarker study. Amyotroph. Lateral Scler. Frontotemporal Degener. 15, 601–

486           609. doi:10.3109/21678421.2014.951940

487   Montazeri, N., Manuel, C., Moorman, E., Khatiwada, J.R., Williams, L.L., Jaykus, L.-A., 2017.

488           Virucidal Activity of Fogged Chlorine Dioxide- and Hydrogen Peroxide-Based Disinfectants

489           against Human Norovirus and Its Surrogate, Feline Calicivirus, on Hard-to-Reach Surfaces.

490           Front. Microbiol. 8, 1031. doi:10.3389/fmicb.2017.01031

491   Mork, A.-K., Hesse, M., Abd El Rahman, S., Rautenschlein, S., Herrler, G., Winter, C., 2014.

492           Differences in the tissue tropism to chicken oviduct epithelial cells between avian

493           coronavirus IBV strains QX and B1648 are not related to the sialic acid binding properties of

494           their spike proteins. Vet. Res. 45, 67. doi:10.1186/1297-9716-45-67

495   Naguib, M.M., El-Kady, M.F., Lüscho, D., Hassan, K.E., Arafa, A.-S., El-Zanaty, A., Hassan, M.K.,

496           Hafez, H.M., Grund, C., Harder, T.C., 2017. New real time and conventional RT-PCRs for

497           updated molecular diagnosis of infectious bronchitis virus infection (IBV) in chickens in Egypt

498           associated with frequent co-infections with avian influenza and Newcastle Disease viruses. J.

499           Virol. Methods 245, 19–27. doi:10.1016/j.jviromet.2017.02.018

500   Nicola, M., Alsafi, Z., Sohrabi, C., Kerwan, A., Al-Jabir, A., Iosifidis, C., Agha, M., Agha, R., 2020. The

501           socio-economic implications of the coronavirus pandemic (COVID-19): A review. Int. J. Surg.

502           doi:10.1016/j.ijsu.2020.04.018

503   Noss, C.I., Olivieri, V.P., 1985. Disinfecting capabilities of oxychlorine compounds. Appl. Environ.

504           Microbiol. 50, 1162–1164. doi:10.1128/AEM.50.5.1162-1164.1985

505   Ogata, N., Shibata, T., 2008. Protective effect of low-concentration chlorine dioxide gas against

506           influenza A virus infection. J. Gen. Virol. 89, 60–67. doi:10.1099/vir.0.83393-0

507   Otsuki, K., Noro, K., Yamamoto, H., Tsubokura, M., 1979. Studies on avian infectious bronchitis

508 virus (IBV). II. Propagation of IBV in several cultured cells. Arch. Virol. 60, 115–122.

509 doi:10.1007/BF01348027

510 R Core Team, 2016. R Development Core Team. R A Lang. Environ. Stat. Comput.

511 Robb, J.A., Bond, C.W., 1979. Coronaviridae, in: Fraenkel-Conrat, H., Wagner, R.R. (Eds.),

512 Comprehensive Virology. Springer, Boston. doi:[https://doi.org/10.1007/978-1-4684-3563-](https://doi.org/10.1007/978-1-4684-3563-4_3)

513 4\_3

514 Romanoff, A., Romanoff, A., 1972. Spontaneous malformations, in: Romanoff, A.L. (Ed.),

515 Pathogenesis of the avian embryo: an analysis of causes of malformations and prenatal

516 death. Wiley-Interscience, New York. ISBN:978-0471732402

517 Romanovsky, A., Djogovic, D., Chin, D., 2013. A case of sodium chlorite toxicity managed with

518 concurrent renal replacement therapy and red cell exchange. J. Med. Toxicol. Off. J. Am. Coll.

519 Med. Toxicol. 9, 67–70. doi:10.1007/s13181-012-0256-9

520 Schalm, O.W., Jain, N.C., 1986. Schalm's veterinary hematology, 4th editio. ed. Lea & Febiger,

521 Philadelphia.

522 Sigstam, T., Rohatschek, A., Zhong, Q., Brennecke, M., Kohn, T., 2014. On the cause of the tailing

523 phenomenon during virus disinfection by chlorine dioxide. Water Res. 48, 82–89.

524 doi:10.1016/j.watres.2013.09.023

525 Simonet, J., Gantzer, C., 2006. Degradation of the Poliovirus 1 genome by chlorine dioxide. J. Appl.

526 Microbiol. 100, 862–870. doi:10.1111/j.1365-2672.2005.02850.x

527 Sinha, N., Balayla, G., 2020. Hydroxychloroquine and covid-19. Postgrad. Med. J.

528 doi:10.1136/postgradmedj-2020-137785

529 Stewart, D.J., Napolitano, M.J., Bakhmutova-Albert, E. V, Margerum, D.W., 2008. Kinetics and



530 mechanisms of chlorine dioxide oxidation of tryptophan. *Inorg. Chem.* 47, 1639–1647.  
531 doi:10.1021/ic701761p

532 Toback, F.G., 1992. Regeneration after acute tubular necrosis. *Kidney Int.* 41, 226–246.  
533 doi:10.1038/ki.1992.32

534 Tsai, C.-T., Tsai, H.-F., Wang, C.-H., 2016. Detection of infectious bronchitis virus strains similar to  
535 Japan in Taiwan. *J. Vet. Med. Sci.* 78, 867–871. doi:10.1292/jvms.15-0609

536 Tsai, C.-T., Wu, H.-Y., Wang, C.-H., 2020. Genetic sequence changes related to the attenuation of  
537 avian infectious bronchitis virus strain TW2575/98. *Virus Genes* 56, 369–379.  
538 doi:10.1007/s11262-020-01753-5

539 Veerasarn, V., Khorprasert, C., Lorvidhaya, V., Sangruchi, S., Tantivatana, T., Narkwong, L.,  
540 Kongthanarat, Y., Chitapanarux, I., Tesavibul, C., Panichevaluk, A., Puribhat, S.,  
541 Sangkittipai boon, S., Sookpreedee, L., Lertsanguansinchai, P., Phromratanapongse, P.,  
542 Rungpoka, P., Trithratipvikul, S., Lojanapiwat, B., Ruangdilokrat, S., Ngampanprasert, P.,  
543 2004. Reduced recurrence of late hemorrhagic radiation cystitis by WF10 therapy in cervical  
544 cancer patients: a multicenter, randomized, two-arm, open-label trial. *Radiother. Oncol. J.*  
545 *Eur. Soc. Ther. Radiol. Oncol.* 73, 179–185. doi:10.1016/j.radonc.2004.05.007

546 Villar, J., Añón, J.M., Ferrando, C., Aguilar, G., Muñoz, T., Ferreres, J., Ambrós, A., Aldecoa, C.,  
547 Suárez-Sipmann, F., Thorpe, K.E., Jüni, P., Slutsky, A.S., Ferrando, C., Mellado-Artigas, R.,  
548 Fernández, J., Hernández, M., Castellá, M., Castro, P., Badia, J.R., Aguilar, G., Carbonell, J.A.,  
549 Badenes, R., Tornero, C., Ferreres, J., Blasco, M.L., Carbonell, N., Serrano, A., Juan, M.,  
550 Gómez-Herreras, J.I., López, M.L., Ambrós, A., Martín, C., Del Campo, R., Puig-Bernabeu, J.,  
551 Ferrer, C., De Andrés, J., Muñoz, T., Serna-Grande, P., Tamayo, G., Martínez-Ruiz, A., Bilbao-  
552 Villasante, I., Villar, J., Fernández, R.L., Calvo, C.P., Vidal, Á., Añón, J.M., Figueira, J.C., Asensio,

553 M.J., Maseda, E., Suárez-Sipmann, F., Ramasco, F., Varela-Durán, M., Díaz-Parada, P.,  
554 Trenado-Álvarez, J., Fernández, M.M., Aldecoa, C., Rico-Feijoo, J., Fernández, L., Sánchez-  
555 Ballesteros, J., Blanco-Schweizer, P., Martínez, D., Soler, J.A., Slutsky, A.S., Jüni, P., Thorpe,  
556 K.E., Thomas, R., Wysocki, K., De Verno, P., Lakhanpal, G., Juando-Prats, C., 2020. Efficacy of  
557 dexamethasone treatment for patients with the acute respiratory distress syndrome caused  
558 by COVID-19: Study protocol for a randomized controlled superiority trial. *Trials*.  
559 doi:10.1186/s13063-020-04643-1

560 Wang, X.-W., Li, J.-S., Jin, M., Zhen, B., Kong, Q.-X., Song, N., Xiao, W.-J., Yin, J., Wei, W., Wang, G.-  
561 J., Si, B.-Y., Guo, B.-Z., Liu, C., Ou, G.-R., Wang, M.-N., Fang, T.-Y., Chao, F.-H., Li, J.-W., 2005.  
562 Study on the resistance of severe acute respiratory syndrome-associated coronavirus. *J. Virol.*  
563 *Methods* 126, 171–177. doi:10.1016/j.jviromet.2005.02.005

564 Wang, Yeming, Zhang, D., Du, G., Du, R., Zhao, J., Jin, Y., Fu, S., Gao, L., Cheng, Z., Lu, Q., Hu, Y.,  
565 Luo, G., Wang, K., Lu, Y., Li, H., Wang, S., Ruan, S., Yang, C., Mei, C., Wang, Yi, Ding, D., Wu, F.,  
566 Tang, X., Ye, X., Ye, Y., Liu, B., Yang, J., Yin, W., Wang, A., Fan, G., Zhou, F., Liu, Z., Gu, X., Xu,  
567 J., Shang, L., Zhang, Y., Cao, L., Guo, T., Wan, Y., Qin, H., Jiang, Y., Jaki, T., Hayden, F.G., Horby,  
568 P.W., Cao, B., Wang, C., 2020. Remdesivir in adults with severe COVID-19: a randomised,  
569 double-blind, placebo-controlled, multicentre trial. *Lancet*. doi:10.1016/S0140-  
570 6736(20)31022-9

571 Wickramasinghe, I.N.A., de Vries, R.P., Gröne, A., de Haan, C.A.M., Verheije, M.H., 2011. Binding of  
572 avian coronavirus spike proteins to host factors reflects virus tropism and pathogenicity. *J.*  
573 *Virol.* 85, 8903–8912. doi:10.1128/JVI.05112-11

574 WHO, 2020. Corticosteroids for COVID-19. World Health Organization. WHO/2019-  
575 nCoV/Corticosteroids/2020.1. <https://www.who.int/publications/i/item/WHO-2019-nCoV->

576           Corticosteroids-2020.1

577   Yingsakmongkol, N., 2013. Clinical outcomes of WF10 adjunct to standard treatment of diabetic

578           foot ulcers. *J. Wound Care* 22, 130-132,134-136. doi:10.12968/jowc.2013.22.3.130

579   Yingsakmongkol, N., Maraprygsavan, P., Sukosit, P., 2011. Effect of WF10 (immunokine) on

580           diabetic foot ulcer therapy: a double-blind, randomized, placebo-controlled trial. *J. foot ankle*

581           *Surg. Off. Publ. Am. Coll. Foot Ankle Surg.* 50, 635–640. doi:10.1053/j.jfas.2011.05.006

582   Zhong, Q., Carratalà, A., Ossola, R., Bachmann, V., Kohn, T., 2017. Cross-Resistance of UV- or

583           chlorine dioxide-resistant echovirus 11 to other disinfectants. *Front. Microbiol.* 8, 1928.

584           doi:10.3389/fmicb.2017.01928

585   Zhu, Z., Guo, Y., Yu, P., Wang, X., Zhang, X., Dong, W., Liu, X., Guo, C., 2019. Chlorine dioxide

586           inhibits the replication of porcine reproductive and respiratory syndrome virus by blocking

587           viral attachment. *Infect. Genet. Evol. J. Mol. Epidemiol. Evol. Genet. Infect. Dis.* 67, 78–87.

588           doi:10.1016/j.meegid.2018.11.002

## 589 Figures

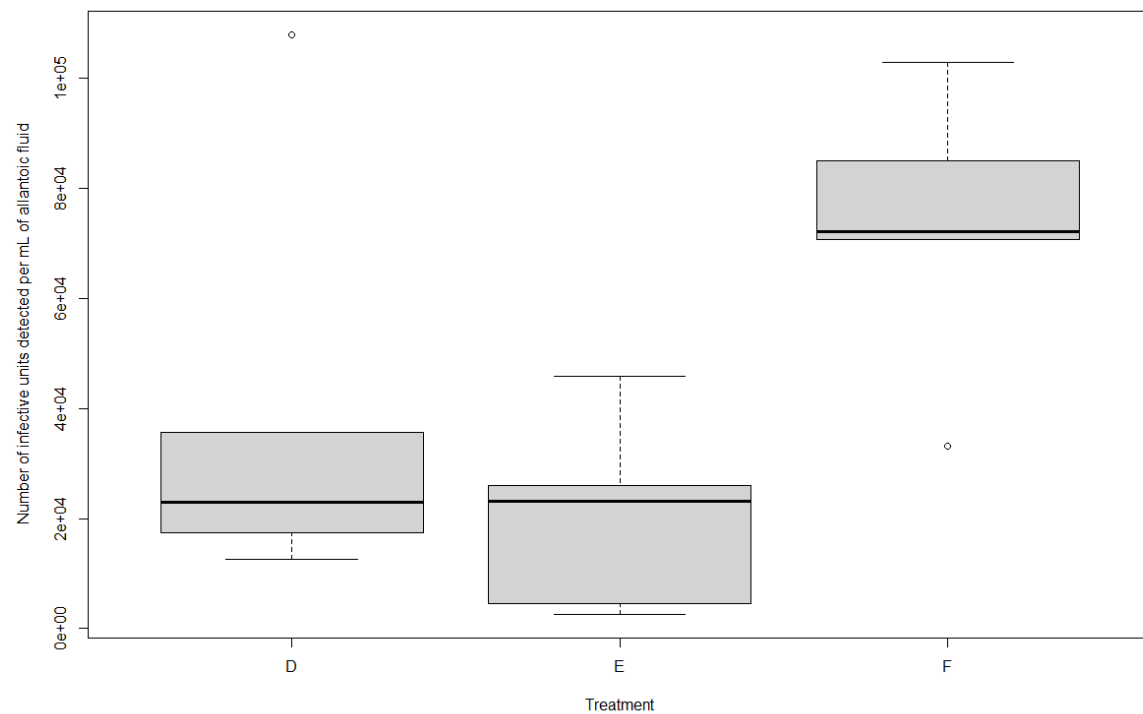

590

591 **Figure 1.** Virus RNA copy number in the allantoic fluid of the infected embryos per treatment group. Virus  
592 copy number was calculated by the geometric mean of the triplicate Cq value referred to the standard curve  
593 (see methods). Experimental groups D to F contained virus-inoculated embryos (D: Low dose of ClO<sub>2</sub>, E: High  
594 dose of ClO<sub>2</sub>, F. Viral control). For details on treatments, see Table 1.

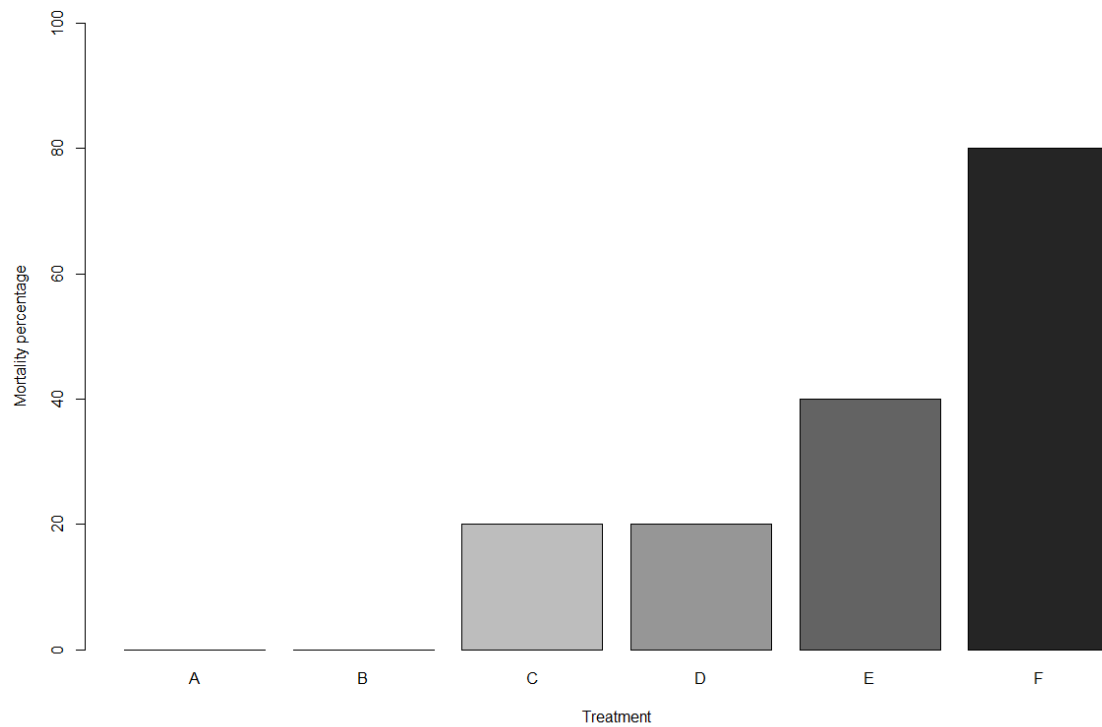

**Figure 2.** Chick embryo mortality during the experiment. Experimental groups A to C contained virus-free embryos (A: Experimental control, B: Low dose of ClO<sub>2</sub>, C: High dose of ClO<sub>2</sub>); experimental groups D to F contained virus-inoculated embryos (D: Low dose of ClO<sub>2</sub>, E: High dose of ClO<sub>2</sub>, F: Viral control). For details on treatments, see Table 1.

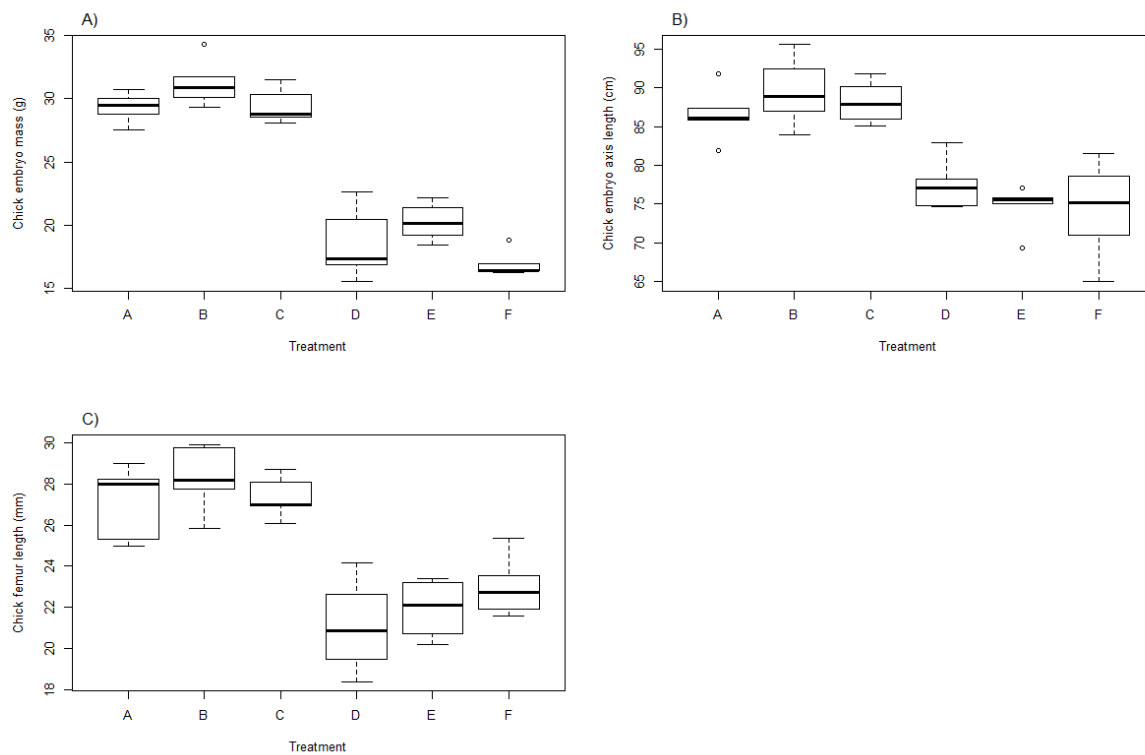

**Figure 3.** Chick embryo development at the end of the experiment (day 17 of incubation). A) mass, B) body axis, C) femur length. Experimental groups A to C contained virus-free embryos (A: Experimental control, B: Low dose of ClO<sub>2</sub>, C: High dose of ClO<sub>2</sub>); experimental groups D to F contained virus-inoculated embryos (D: Low dose of ClO<sub>2</sub>, E: High dose of ClO<sub>2</sub>, F: Viral control). For details on treatments, see Table 1.

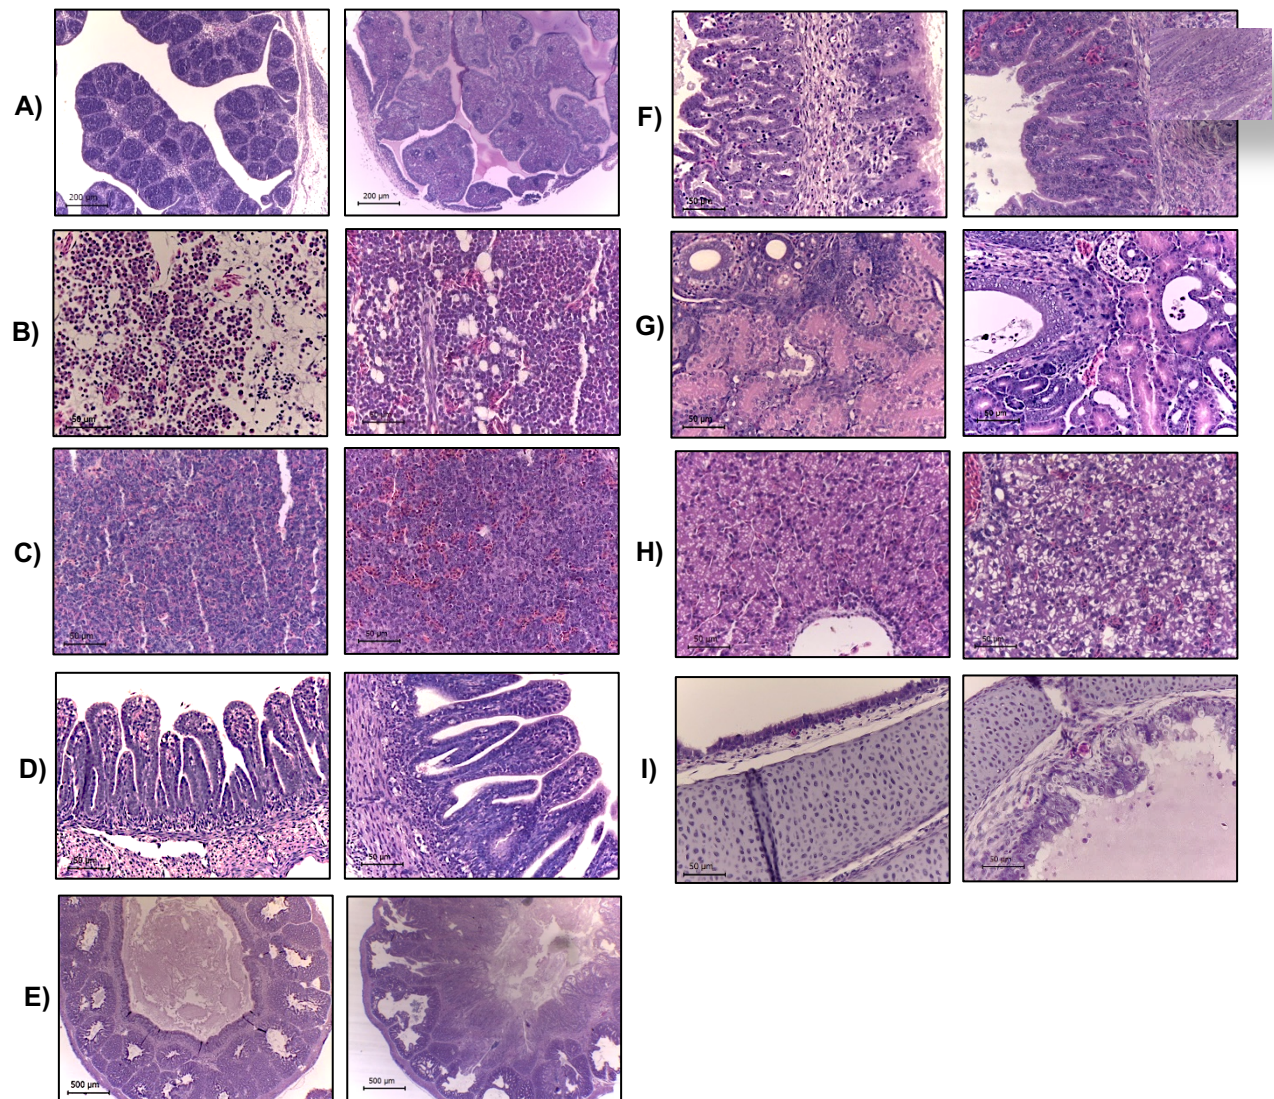

**Figure 4.** Histology of selected tissues from 17-day-old chick embryos. In each row, microphotograph pairs show H&E-stained representative tissues of non-infected (left) and infected embryos (right), A) Bursa of Fabricio (100X). Infected embryos showed severe lymphoid depletion, with approximately 10% of active lymphoid tissue and abundant heterophils. B) Bone marrow (400 X). Infected embryos showed an increase in erythroid cellularity ne, C) Spleen (400 X), Infected embryos showed reticuloendothelial hyperplasia, D) Duodenum (400 X). Infected embryos showed mild villous atrophy, E) Proventriculus (40X). Infected embryos showed epithelial hyperplasia with desquamation and hyaline material, F) Proventriculus (400X). Image shows the increased length of the proventricular folds and mitotic cells indicative of epithelial



627 regeneration, G) Kidney (400X). Infected embryos showed swelling, cell detritus and protein within the  
628 tubules, and basophilic material compatible with urate crystals, H) Liver (400X). Infected embryos showed  
629 glucogenic degeneration, I) Trachea (400X). Infected embryos showed hyperplasia and epithelial  
630 degeneration. Scale = 50  $\mu$ m in all panels except for E (scale = 500  $\mu$ m).



**Table 1.** Experimental groups used to assess the *in vivo* antiviral effect of high and low concentrations of ClO<sub>2</sub> solution in chick embryos. The table shows the number of embryos included in each group. (LD: Low dose, HD: High dose)

| Group                                 | N | Treatment                                                                                                                                                                                                                                                             |
|---------------------------------------|---|-----------------------------------------------------------------------------------------------------------------------------------------------------------------------------------------------------------------------------------------------------------------------|
| Group A (Experimental control)        | 5 | 200 µl of sterile 0.9% saline solution                                                                                                                                                                                                                                |
| Group B (ClO <sub>2</sub> LD)         | 5 | 100 µl of sterile ClO <sub>2</sub> solution (30 ppm <sup>1</sup> ) and 100 µl of sterile 0.9% saline solution                                                                                                                                                         |
| Group C (ClO <sub>2</sub> HD)         | 5 | 100 µl of sterile ClO <sub>2</sub> solution (300 ppm <sup>2</sup> ) and 100 µl of sterile 0.9% saline solution                                                                                                                                                        |
| Group D (Virus + ClO <sub>2</sub> LD) | 5 | 100 µl of resuspended avian coronavirus vaccine and 100 µl of sterile ClO <sub>2</sub> solution (30 ppm)                                                                                                                                                              |
| Group E (Virus + ClO <sub>2</sub> HD) | 5 | 100 µl of resuspended avian coronavirus vaccine and 100 µl of sterile ClO <sub>2</sub> solution (300 ppm)                                                                                                                                                             |
| Group F (Viral control)               | 5 | 100 µl of resuspended live attenuated avian coronavirus vaccine (Bron Blen® Merial, containing 10 <sup>4</sup> of mean embryo infective dose (EID <sub>50</sub> )/mL of coronavirus strains Massachusetts and Connecticut) and 100 µl of sterile 0.9% saline solution |

<sup>1</sup> This concentration is 10 times below the no-observed-adverse-effect level (NOAEL; 3.5 mg/kg per day) determined for ClO<sub>2</sub> (Bercz et al. 1982), considering an embryonic mass of 10 g at the time of inoculation.

<sup>2</sup> This concentration is equal to the NOAEL considering an embryonic mass of 10 g at the time of inoculation.

**Table 2. Macroscopic abnormalities observed at necropsy in the chick embryos.** The table

shows the number of embryos in each group that presented each lesion. (LD: Low dose, HD:

High dose)

|                                       | Dwarfing         | Curling          | White caseous material | Thickened membranes | Oedema | Epidermal congestion | Pale and enlarged kidneys |
|---------------------------------------|------------------|------------------|------------------------|---------------------|--------|----------------------|---------------------------|
| Group A (Experimental control)        | 0/5 <sup>f</sup> | 0/5 <sup>f</sup> | 0/5 <sup>f</sup>       | 0/5 <sup>f</sup>    | 0/5    | 0/5 <sup>f</sup>     | 0/5                       |
| Group B (ClO <sub>2</sub> LD)         | 0/5 <sup>f</sup> | 0/5 <sup>f</sup> | 0/5 <sup>f</sup>       | 0/5 <sup>f</sup>    | 0/5    | 0/5 <sup>f</sup>     | 0/5                       |
| Group C (ClO <sub>2</sub> HD)         | 0/5 <sup>f</sup> | 0/5 <sup>f</sup> | 1/5 <sup>f</sup>       | 0/5 <sup>f</sup>    | 0/5    | 2/5                  | 0/5                       |
| Group D (Virus + ClO <sub>2</sub> LD) | 5/5 <sup>a</sup> | 1/5              | 1/5 <sup>f</sup>       | 0/5 <sup>f</sup>    | 0/5    | 2/5                  | 5/5 <sup>f,a</sup>        |
| Group E (Virus + ClO <sub>2</sub> HD) | 5/5 <sup>a</sup> | 0/5 <sup>f</sup> | 1/5 <sup>f</sup>       | 0/5 <sup>f</sup>    | 0/5    | 2/5                  | 3/5 <sup>a</sup>          |
| Group F (Viral control)               | 5/5 <sup>a</sup> | 4/5 <sup>a</sup> | 4/5 <sup>a</sup>       | 4/5 <sup>a</sup>    | 1/5    | 5/5 <sup>a</sup>     | 1/5                       |

<sup>a</sup>: Indicates a significant difference to the experimental control

<sup>f</sup>: Indicates a significant difference to the viral control

**Table 3. Microscopic abnormalities related to avian coronavirus infection in the chick embryos.** (LD: Low dose, HD: High dose)

[illegible]
